# Supplementary material for: Demystifying the Influencing Factors of Construction 4.0 Technology Implementation from a Sustainability Starting Point: Current Trends and Future Research Roadmap
Source: MDPI journal article supplement (doi:10.3390/buildings14020552), 2024-02-19
Supplement: s1 [file s1]

Archive with 1 entries (1 files):
- buildings-2855031-supplementary.pdf
