# Supplementary material for: Demystifying the Influencing Factors of Construction 4.0 Technology Implementation from a Sustainability Starting Point: Current Trends and Future Research Roadmap
Source: MDPI journal article supplement (doi:10.3390/buildings14020552), 2024-02-19
Supplement: s1 [file s1 › buildings-2855031-supplementary.pdf]

## Supplemental Materials

|                                                                                                     |    |
|-----------------------------------------------------------------------------------------------------|----|
| Table S1. Descriptions and sample applications of Construction 4.0 technologies. ....               | 2  |
| Table S2. Distribution of included journals. ....                                                   | 4  |
| Table S3. Distribution of countries or regions. ....                                                | 5  |
| Table S4. Details of multi-country studies. ....                                                    | 5  |
| Table S5. Identified influencing factors related to Construction 4.0 Technology Implementation..... | 6  |
| Table S6. Types of the reviewed articles and the corresponding reference matrices. ....             | 10 |
| Table S7. Differences between the results from social network analysis and simplified analysis..... | 11 |
| Figure S1. Example of a reference matrix. ....                                                      | 13 |
| Figure S2. Example of the development of a factor-factor matrix.....                                | 13 |
| Reference .....                                                                                     | 14 |

**Table S1.** Descriptions and sample applications of Construction 4.0 technologies.

| <b>Technologies</b>                                                    | <b>Descriptions</b>                                                                                                                                                                                                                                                                                                                                                                                        | <b>Sample applications in construction</b>                                                                                                                                                                                    |
|------------------------------------------------------------------------|------------------------------------------------------------------------------------------------------------------------------------------------------------------------------------------------------------------------------------------------------------------------------------------------------------------------------------------------------------------------------------------------------------|-------------------------------------------------------------------------------------------------------------------------------------------------------------------------------------------------------------------------------|
| Laser scanner/3D Scanner                                               | It is a type of scanner that can contain both color and depth information of the scanned image.<br><br>It can automatically identify and track tags attached to objects, such as tracking transportation during construction.                                                                                                                                                                              | The scanner can implement 3D recording of construction sites with the scanner [1].<br><br>Bluetooth, Wi-Fi, Ultra-Wideband (UWB), and Near Field Communication (NFC) are applied for communication on construction sites [2]. |
| Sensors and actuators                                                  | They are devices for data collection using the reflection of the waves with different wavelengths.                                                                                                                                                                                                                                                                                                         | Different sensors record different types of data during construction. For instance, thermography sensors are applied to improve building envelope thermal performance [3].                                                    |
| Unmanned aerial vehicles (UAV/drone)                                   | It is an aircraft without a human pilot on board and is usually known as a drone.                                                                                                                                                                                                                                                                                                                          | It can capture images to provide construction information, such as 3D point clouds or RGB images, without on-site inspection for construction progress monitoring [4].                                                        |
| New materials                                                          | They refer to advanced materials, such as nanotechnology, which are innovatively applied in industry.                                                                                                                                                                                                                                                                                                      | Advanced materials for a circular economy can be applied in product life cycle management [5].                                                                                                                                |
| Building Information Modeling (BIM)                                    | It is defined as “a digital representation of physical and functional characteristics of a facility” by the National Building Information Model Standard Project Committee of the United States [6].                                                                                                                                                                                                       | BIM 3D models can be applied to visualize building components, optimize buildings' performance, and help improve the project delivery process [7].                                                                            |
| Additive manufacturing (3D printing)                                   | It is defined as “the process of joining materials to make objects from three-dimensional (3D) model data, usually layer upon layer, as opposed to subtractive manufacturing methodologies, such as traditional machining” by the American Society for Testing and Materials [8].                                                                                                                          | It can provide 3D-printed buildings with unlimited shapes to be constructed using innovative materials to replace human labor [5].                                                                                            |
| light detection and ranging (LiDAR)                                    | It is a method for determining ranges by measuring the time for the reflected laser beam to return to the receiver.                                                                                                                                                                                                                                                                                        | LiDAR can provide 3D spatial relationships of objects, such as buildings and roads, surveying before and during construction [9].                                                                                             |
| Artificial intelligence (AI)                                           | It is an area of computer science that enables machines to generate intelligence that helps them to work and react like humans.                                                                                                                                                                                                                                                                            | It can be applied for automation in construction, such as modular or temporary construction object detection for risk management [10,11].                                                                                     |
| Virtual Reality (VR)/<br>Augmented Reality (AR)/<br>Mixed Reality (MR) | VR works to generate entirely computer-generated environments that allow users to sense of being complemented immersed in the virtual environment. AR is a technology that enables the overlay of digital information onto the real environment to enhance the real environment. Finally, MR refers to a virtual continuum or the spectrum whereby different technologies exist with the mix of VR and AR. | In the UK's AEC industry, AR and VR are considered as crucial new technologies to facilitate infrastructure delivery and maintenance productivity and support decision-making [12].                                           |
| Robotics                                                               | It contains several intelligent robots which perform tasks by themselves with high autonomy or without explicit human control.                                                                                                                                                                                                                                                                             | Some repetitive and dangerous construction tasks can be executed by robotic systems and their applications, such as progress                                                                                                  |

| Technologies                                                              | Descriptions                                                                                                                                                                                                                                                                | Sample applications in construction                                                                                                                                                                                                                                                                                  |
|---------------------------------------------------------------------------|-----------------------------------------------------------------------------------------------------------------------------------------------------------------------------------------------------------------------------------------------------------------------------|----------------------------------------------------------------------------------------------------------------------------------------------------------------------------------------------------------------------------------------------------------------------------------------------------------------------|
|                                                                           |                                                                                                                                                                                                                                                                             | monitoring and building inspection [13].                                                                                                                                                                                                                                                                             |
| Big data                                                                  | It refers to storing a large volume of data that is hard to process by traditional methods.                                                                                                                                                                                 | Big data technology can help other technologies, such as the cyber-physical system, store huge amounts of data [14].                                                                                                                                                                                                 |
| Blockchain or distributed ledger technologies (DLT)                       | It is a database or system of recording information which is difficult or impossible to change.                                                                                                                                                                             | With the integration of IoT and BIM, DLT can help to track building components and information sharing [15].                                                                                                                                                                                                         |
| Cloud computing                                                           | It delivers computing services such as servers, databases, and software over the Internet with remote control.                                                                                                                                                              | Cloud computing can provide digitization and visualization in the cloud for storing data and making decisions [16].                                                                                                                                                                                                  |
| Cyber security                                                            | It protects systems, devices, and data from cyber-attacks.                                                                                                                                                                                                                  | Sensitive cyber information and construction processes can be protected with cyber security systems [17].                                                                                                                                                                                                            |
| Cyber-physical system (CPS)                                               | It is a system integrating computation and networking into physical processes. Embedded computers and networks monitor and control the physical processes.                                                                                                                  | It provides bi-directional information to monitor construction projects and alert possible problems in the physical environment [18].                                                                                                                                                                                |
| Global navigation satellite system (GNSS)/Global positioning system (GPS) | GNSS is a general terminology describing any satellite-based radio navigation system that provides positioning, navigation, and timing services. One of the famous GNSS is GPS. GPS can calculate and display accurate locations, time, and speed information in real time. | It can provide real-time locations of assets for planning and surveying before and during construction projects [19].                                                                                                                                                                                                |
| Geographic information system (GIS)                                       | GIS was coined by Tomlinson [20] and was defined as “a computer-based system, whereby map and related data can be stored in a form suitable for rapid measurement and comparison.”                                                                                          | GIS can be integrated with BIM, GPS, or VR/AR for localization and visualization of products to assist analysis during the whole project lifecycle phase. It can map the location and transportation network of resources for a project, so the distribution of resources can be analyzed based on a 3D map [21,22]. |
| Remote sensing (RS)                                                       | It is defined as “the process of detecting and monitoring the physical characteristics of an area by measuring its reflected and emitted radiation at a distance” by the United States Geological Survey [23].                                                              | Data in construction can be recorded automatically with RS technologies [24]. Furthermore, over the years, surface subsidence and land deformation can be detected by RS for surveying and planning before construction [25].                                                                                        |
| Industrial Internet of Things (IIoT)                                      | It refers to the various sets of hardware equipment in the construction project that are connected to the Internet for collecting and sharing data.                                                                                                                         | IIoT can be used to secure construction and better process control and optimization through real-time data sharing and monitoring [26].                                                                                                                                                                              |

**Table S2.** Distribution of included journals.

| No.          | Journal                                                     | Number of articles |
|--------------|-------------------------------------------------------------|--------------------|
| 1            | Automation in Construction                                  | 7                  |
| 2            | Buildings                                                   | 6                  |
| 3            | Construction Innovation-England                             | 5                  |
| 4            | International Journal of Construction Management            | 5                  |
| 5            | Journal of Information Technology in Construction           | 5                  |
| 6            | Journal of Management in Engineering                        | 5                  |
| 7            | Engineering Construction and Architectural Management       | 4                  |
| 8            | Journal of Civil Engineering and Management                 | 4                  |
| 9            | Journal of Construction Engineering and Management          | 4                  |
| 10           | Computers in Industry                                       | 3                  |
| 11           | Sustainability                                              | 3                  |
| 12           | Applied Sciences-Basel                                      | 2                  |
| 13           | Journal of Cleaner Production                               | 2                  |
| 14           | Academic Journal of Interdisciplinary Studies               | 1                  |
| 15           | Advanced Engineering Informatics                            | 1                  |
| 16           | Ain Shams Engineering Journal                               | 1                  |
| 17           | Archives of Computational Methods in Engineering            | 1                  |
| 18           | Benchmarking: An International Journal                      | 1                  |
| 19           | Built Environment Project and Asset Management              | 1                  |
| 20           | Business Process Management Journal                         | 1                  |
| 21           | Construction Economics and Building                         | 1                  |
| 22           | Economies                                                   | 1                  |
| 23           | IEEE Access                                                 | 1                  |
| 24           | IEEE Transactions on Industrial Informatics                 | 1                  |
| 25           | Intelligent Buildings International                         | 1                  |
| 26           | International Journal of Civil Engineering                  | 1                  |
| 27           | International Journal of Scientific and Technology Research | 1                  |
| 28           | Journal of Civil Engineering                                | 1                  |
| 29           | Journal of Engineering, Design and Technology               | 1                  |
| 30           | Journal of leadership studies                               | 1                  |
| 31           | Malaysian Construction Research Journal                     | 1                  |
| 32           | Materials & Design                                          | 1                  |
| 33           | Polymers                                                    | 1                  |
| 34           | Smart and Sustainable Built Environment                     | 1                  |
| 35           | Sustainable Development                                     | 1                  |
| <b>Total</b> |                                                             | <b>77</b>          |

**Table S3.** Distribution of countries or regions.

| No. | Country or region | Number of selected articles |
|-----|-------------------|-----------------------------|
| 1   | Unspecified       | 28                          |
| 2   | Multi-country     | 11                          |
| 3   | United States     | 7                           |
| 4   | Nigeria           | 6                           |
| 5   | South African     | 4                           |
| 6   | UK                | 3                           |
| 7   | Turkey            | 2                           |
| 8   | Switzerland       | 2                           |
| 9   | New Zealand       | 2                           |
| 10  | China (HK)        | 2                           |
| 11  | China             | 2                           |
| 12  | Vietnam           | 1                           |
| 13  | Spain             | 1                           |
| 14  | Singapore         | 1                           |
| 15  | Qatar             | 1                           |
| 16  | Norway            | 1                           |
| 17  | Malaysia          | 1                           |
| 18  | France            | 1                           |
| 19  | Australia         | 1                           |
|     | <b>Total</b>      | <b>77</b>                   |

**Table S4.** Details of multi-country studies.

| No. | Relevant countries                                                                             |
|-----|------------------------------------------------------------------------------------------------|
| 1   | US, UK, and South Korea                                                                        |
| 2   | Association of Southeast Asian Nations, China, Korea, China (Taiwan), the Middle East, Finland |
| 3   | UK, Canada, Qatar, US, Spain, Bahrain, Australia, Kuwait, Germany, China, and Egypt            |
| 4   | UK, China, US                                                                                  |
| 5   | UK, US                                                                                         |
| 6   | Korea, US                                                                                      |
| 7   | UK, US, Germany                                                                                |
| 8   | UK, Hong Kong, US, South Korea, Sweden, Mainland China, Germany, Australia                     |
| 9   | US, Canada                                                                                     |
| 10  | China, US                                                                                      |
| 11  | UK, China, South Korea                                                                         |

**Table S5.** Identified influencing factors related to Construction 4.0 Technology Implementation.

| Category                       | Code | Influencing factors                                              | Descriptions                                                                                                                                                                                            |
|--------------------------------|------|------------------------------------------------------------------|---------------------------------------------------------------------------------------------------------------------------------------------------------------------------------------------------------|
| <b>External environment</b>    | F1   | Level of awareness, acceptance, and applications in the industry | It refers to the level of awareness, acceptance, and market knowledge; willingness or reluctance to adopt digital technologies in the industry.                                                         |
|                                | F2   | Level of standardization                                         | It refers to the level of standardization in the construction industry.                                                                                                                                 |
|                                | F3   | Market demand                                                    | It refers to the continuous owners', customers', clients', or subcontractors' requirements, interests, demands, or leadership of digital technologies.                                                  |
|                                | F4   | Fragmentation of the construction industry                       | It refers to the fragmented nature of construction projects and the supply chain due to the many stakeholders and subcontracting.                                                                       |
|                                | F5   | Appropriate legislation                                          | It refers to the development of the appropriate legal framework and government regulations.                                                                                                             |
|                                | F6   | Shared knowledge and training schemes in the industry            | It refers to knowledge-sharing, training schemes, or platforms (e.g., seminars, workshops, conferences) in the industry.                                                                                |
|                                | F7   | Governmental initiatives or incentives                           | It refers to government guidance, initiatives, or incentives.                                                                                                                                           |
|                                | F8   | Persuasion and inspiration                                       | It refers to the adoption of BIM by other stakeholders in the industry, the subjective norm in the industry, social trends, and inclusion.                                                              |
|                                | F9   | Advanced technology development in the industry                  | It refers to the advanced technology development in the implementation of C4.0 digital technologies.                                                                                                    |
|                                | F10  | Pressure to innovate                                             | It refers to the market pressure to innovate and adapt to technological change.                                                                                                                         |
| <b>Project-related factors</b> | F11  | Project size, complexity, site nature, scope, delivery method    | It refers to the effects of project attributes such as project size, complexity, site nature, scope, and delivery method on the implementation of C4.0 digital technologies.                            |
|                                | F12  | Lack of legal framework and contract uncertainties               | It refers to the lack of legal framework and contractual uncertainties concerning the use of C4.0 digital technologies.                                                                                 |
|                                | F13  | Effective communication among project stakeholders               | It refers to effective communication among project stakeholders.                                                                                                                                        |
|                                | F14  | Clear contractual provisions                                     | It refers to the robust and precise contractual provisions such as data integrity and reliability, the duties and power of information management, and procedures on formation sharing and appointment. |
|                                | F15  | Level of stakeholder collaboration and coordination              | It refers to the level of the project stakeholder to work together in design, construction, engineering, and facility management processes to achieve a shared desired outcome.                         |
|                                | F16  | Lack of commitment from clients                                  | It refers to the lack of commitment from project clients.                                                                                                                                               |
|                                | F17  | Health and safety risks in the workplace                         | It refers to the potential health and safety risks regarding any hazards resulting from the use of C4.0 digital technologies (e.g., robotics and automation technologies)                               |

| Category                      | Code | Influencing factors                                     | Descriptions                                                                                                                                                                                                                                                                    |
|-------------------------------|------|---------------------------------------------------------|---------------------------------------------------------------------------------------------------------------------------------------------------------------------------------------------------------------------------------------------------------------------------------|
|                               |      |                                                         | that could lead to harm or injury to the user in the workplace.                                                                                                                                                                                                                 |
| <b>Organizational factors</b> | F18  | Availability of capabilities                            | It refers to the availability of skilled workers' capabilities, expert knowledge, training, and technical competency.                                                                                                                                                           |
|                               | F19  | Availability of resources                               | It refers to the availability of resources such as technical support from software vendors, equipment specification, time & effort, trainers and training materials, hardware infrastructure, financial resources, information and technology infrastructure, and power supply. |
|                               | F20  | Awareness and willingness within organizations          | It refers to the awareness and willingness of staff to learn new technologies and of top management to implement C4.0 digital technologies within organizations.                                                                                                                |
|                               | F21  | Organizational culture                                  | It refers to the organizational culture for adopting digital technologies and sustainable development.                                                                                                                                                                          |
|                               | F22  | Corporate strategy and management policy                | It refers to the strategic decision from top management, top organizational management support, and strategic plan using C4.0 digital technologies.                                                                                                                             |
|                               | F23  | Organizational business modal adaptation                | It refers to the organizational business model adaptation (e.g., organizational structure) to support C4.0 technology implementation.                                                                                                                                           |
|                               | F24  | Unclear benefits, gains, and business value             | It refers to the uncertainty about the potential benefits, gains, and business value of implementing C4.0 digital technologies.                                                                                                                                                 |
|                               | F25  | Consulting                                              | It refers to receiving consultancy services from other firms and universities.                                                                                                                                                                                                  |
| <b>Technology competence</b>  | F26  | Integration and interoperability                        | It refers to the integration and interoperability of diverse documentation/software/platforms                                                                                                                                                                                   |
|                               | F27  | Quality, safety, health, and risk management            | It refers to quality control, monitoring the structural health, damage identification of buckled or yielded steel, improved site layout, planning, and safety; improved construction project quality; and risk management when applying C4.0 digital technologies.              |
|                               | F28  | Cost-saving                                             | It refers to the potential cost savings when applying C4.0 digital technologies.                                                                                                                                                                                                |
|                               | F29  | Time-saving                                             | It refers to the potential time saving when applying C4.0 digital technologies.                                                                                                                                                                                                 |
|                               | F30  | Improved project efficiency and productivity            | It refers to the potentially improved project efficiency and productivity when applying C4.0 digital technologies.                                                                                                                                                              |
|                               | F31  | Simulation and visualization for better decision-making | It refers to the simulation and visualization estimation for better decision-making when applying C4.0 digital technologies.                                                                                                                                                    |
|                               | F32  | Design flexibility                                      | It refers to assisting in optimizing the design of a building and improving design flexibility.                                                                                                                                                                                 |
|                               | F33  | Resource and waste optimization                         | It refers to waste reduction and reusing components strategies, life cycle management of elements, and waste optimization.                                                                                                                                                      |
|                               | F34  | Improved automation and                                 | It refers to the improved automation and information                                                                                                                                                                                                                            |

| Category              | Code | Influencing factors                                                 | Descriptions                                                                                                                                                                                                                                                                                                             |
|-----------------------|------|---------------------------------------------------------------------|--------------------------------------------------------------------------------------------------------------------------------------------------------------------------------------------------------------------------------------------------------------------------------------------------------------------------|
|                       |      | information-sharing level                                           | sharing level when applying C4.0 digital technologies.                                                                                                                                                                                                                                                                   |
|                       | F35  | Energy efficiency                                                   | It refers to improved energy efficiency and emissions reduction.                                                                                                                                                                                                                                                         |
|                       | F36  | Increased accuracy and reduced errors                               | It refers to higher accuracy and reduced human errors in model-based documentation.                                                                                                                                                                                                                                      |
|                       | F37  | Improved facility management and service                            | It refers to the improved facility management and service when applying C4.0 digital technologies.                                                                                                                                                                                                                       |
|                       | F38  | Mass customization                                                  | It refers to the degree of requirements for mass customization of design and parameters for functional and aesthetic purposes.                                                                                                                                                                                           |
|                       | F39  | Perceived overall organizational performance improvement            | It refers to the perceived overall organizational performance improvement, e.g., organization's work culture, new and better services, organization efficiency, and productivity when applying C4.0 digital technologies. Factors in this category present the desire of firms to strive for firm success as a whole.    |
|                       | F40  | Project planning optimization                                       | It refers to the optimized project planning when applying C4.0 digital technologies.                                                                                                                                                                                                                                     |
|                       | F41  | Improved information retrieval process                              | It refers to the improved information retrieval process when applying C4.0 digital technologies.                                                                                                                                                                                                                         |
|                       | F42  | Increased competitive advantage                                     | It refers to the improved competitive advantage when applying C4.0 digital technologies.                                                                                                                                                                                                                                 |
|                       | F43  | Synchronization of procurement and improved supply chain management | It refers to the synchronization of procurement with design and construction (e.g., e-procurement) and improved supply chain management using intelligent contracts resulting in automated payments, provenance tracking, contract administration, disintermediation, ownership, and data control, and redefining trust. |
|                       | F44  | Reduced labor                                                       | It refers to potentially reduced labor when applying C4.0 digital technologies.                                                                                                                                                                                                                                          |
|                       | F45  | Shared value or value chain                                         | It refers to greater added value for the customer and shared value for stakeholders.                                                                                                                                                                                                                                     |
|                       | F46  | Improved estimation method                                          | It refers to an improved estimation method of the project when applying C4.0 digital technologies.                                                                                                                                                                                                                       |
|                       | F47  | Better project delivery                                             | It refers to better project delivery when applying C4.0 digital technologies.                                                                                                                                                                                                                                            |
|                       | F48  | Easy to use                                                         | It refers to C4.0 digital technologies that are easy for data input and output and can be used easily.                                                                                                                                                                                                                   |
|                       | F49  | Reduced claims or litigation (risks)                                | It refers to reduced potential claims or litigation (risks) when applying C4.0 digital technologies.                                                                                                                                                                                                                     |
|                       | F50  | Optimum performance of manufacturing                                | It refers to optimum performance manufacturing of design-based configuration and assembly.                                                                                                                                                                                                                               |
|                       | F51  | Supporting education and training                                   | It refers to the implementation of C4.0 digital technologies that could support education and training.                                                                                                                                                                                                                  |
| Technology challenges | F52  | Immaturity of the technologies                                      | It refers to the immaturity of the technologies.                                                                                                                                                                                                                                                                         |
|                       | F53  | Data-related issues                                                 | It refers to data-related issues such as lack of data                                                                                                                                                                                                                                                                    |

| Category | Code | Influencing factors                                                     | Descriptions                                                                                                                                                                                                                                          |
|----------|------|-------------------------------------------------------------------------|-------------------------------------------------------------------------------------------------------------------------------------------------------------------------------------------------------------------------------------------------------|
|          |      |                                                                         | accuracy tests, lack of information loss, poor understanding among different stakeholders,                                                                                                                                                            |
|          | F54  | Uncertainty about the cost-efficiency                                   | It refers to the uncertainty about the costs associated with adopting new technologies.                                                                                                                                                               |
|          | F55  | Security of intellectual property and rights                            | It refers to the property rights through patents and copyrights of the model and participants' contributions.                                                                                                                                         |
|          | F56  | Uncertainty about the time efficiency                                   | It refers to the time efficiency associated with adopting new technologies.                                                                                                                                                                           |
|          | F57  | Lack of practical validation                                            | It refers to the lack of consideration of projects, the context conditions, and real practice validation.                                                                                                                                             |
|          | F58  | Energy consumption                                                      | It refers to the potential energy consumption for technology operations.                                                                                                                                                                              |
|          | F59  | Lack of better-performing devices                                       | It refers to the lack of better-performing devices such as better signal range and strength, reduction of damage, faster reaction speed, such as active RFIC, and improved working capacity in the concrete environment of prefabricating components. |
|          | F60  | Difficulty in explaining the output of the new technology to the client | It refers to the difficulty in explaining the output of the new technology to the client.                                                                                                                                                             |

**Table S6.** Types of the reviewed articles and the corresponding reference matrices.

| Reviewed articles                                 | Type | Corresponding reference matrix |   |
|---------------------------------------------------|------|--------------------------------|---|
|                                                   |      | X                              | Y |
| Bock [27]                                         | A    | √                              |   |
| Merschbrock and Munkvold [28]                     | A    | √                              |   |
| Bilal, <i>et al.</i> [29]                         | A    | √                              |   |
| Oesterreich and Teuteberg [30]                    | A    | √                              |   |
| Wu, <i>et al.</i> [31]                            | A    | √                              |   |
| Ozorhon and Karahan [32]                          | A    | √                              |   |
| Amuda-Yusuf [33]                                  | A    | √                              |   |
| Antwi-Afari, <i>et al.</i> [34]                   | A    | √                              |   |
| Chen, <i>et al.</i> [35]                          | A    | √                              |   |
| Dallasega, <i>et al.</i> [36]                     | A    | √                              |   |
| Jin, <i>et al.</i> [37]                           | A    | √                              |   |
| Chan, <i>et al.</i> [38]                          | A    | √                              |   |
| Chowdhury, <i>et al.</i> [39]                     | A    | √                              |   |
| Craveiro, Duarte, Bartolo and Bartolo [9]         | A    | √                              |   |
| García de Soto, <i>et al.</i> [40]                | A    | √                              |   |
| Ibrahim, <i>et al.</i> [41]                       | A    | √                              |   |
| Koseoglu, <i>et al.</i> [42]                      | A    | √                              |   |
| Li, Greenwood and Kassem [15]                     | A    | √                              |   |
| Maskuriy, <i>et al.</i> [43]                      | A    | √                              |   |
| Maskuriy, <i>et al.</i> [44]                      | A    | √                              |   |
| Olawumi and Chan [45]                             | A    | √                              |   |
| Tetik, <i>et al.</i> [46]                         | A    | √                              |   |
| Abdul Nabi and El-adaway [47]                     | A    | √                              |   |
| Adepoju and Aigbavboa [4]                         | A    | √                              |   |
| Alaloul, Liew, Zawawi and Kennedy [16]            | A    | √                              |   |
| Dao, <i>et al.</i> [48]                           | A    | √                              |   |
| Davila Delgado, Oyedele, Beach and Demian [12]    | A    | √                              |   |
| Evans and Farrell [49]                            | A    | √                              |   |
| Evans, <i>et al.</i> [50]                         | A    | √                              |   |
| Forcael, Ferrari, Opazo-Vega and Pulido-Arcas [5] | A    | √                              |   |
| Khoshfetrat, <i>et al.</i> [51]                   | A    | √                              |   |
| Lekan, <i>et al.</i> [52]                         | A    | √                              |   |
| Lekan, <i>et al.</i> [53]                         | A    | √                              |   |
| Maali, <i>et al.</i> [54]                         | A    | √                              |   |
| Newman, <i>et al.</i> [55]                        | A    | √                              |   |
| Okakpu, <i>et al.</i> [56]                        | A    | √                              |   |
| Olanrewaju, <i>et al.</i> [57]                    | A    | √                              |   |
| Osunsanmi, <i>et al.</i> [58]                     | A    | √                              |   |
| Patrucco, <i>et al.</i> [59]                      | A    | √                              |   |
| Perrier, <i>et al.</i> [60]                       | A    | √                              |   |
| Qi, <i>et al.</i> [61]                            | A    | √                              |   |
| Wang, Wang, Sepasgozar and Zlatanova [1]          | A    | √                              |   |
| Wen and Gheisari [62]                             | A    | √                              |   |
| Zabidin, Belayutham and Ibrahim [18]              | A    | √                              |   |
| Abdul Nabi and El-adaway [63]                     | A    | √                              |   |
| Alade, <i>et al.</i> [64]                         | A    | √                              |   |
| Boton, <i>et al.</i> [65]                         | A    | √                              |   |
| Demirkesen and Tezel [66]                         | A    | √                              |   |
| Ghosh, Edwards and Hosseini [26]                  | A    | √                              |   |
| Karmakar and Delhi [67]                           | A    | √                              |   |
| Kedir and Hall [68]                               | A    | √                              |   |
| Kozlovska, <i>et al.</i> [69]                     | A    | √                              |   |
| Lekan, <i>et al.</i> [70]                         | A    | √                              |   |

| Reviewed articles                | Type | Corresponding reference matrix |   |
|----------------------------------|------|--------------------------------|---|
|                                  |      | X                              | Y |
| Li, <i>et al.</i> [71]           | A    | √                              |   |
| Mannino, <i>et al.</i> [72]      | A    | √                              |   |
| Mansour, <i>et al.</i> [73]      | A    | √                              |   |
| Turner, <i>et al.</i> [74]       | A    | √                              |   |
| Gosselin, <i>et al.</i> [75]     | B    |                                | √ |
| Boke, <i>et al.</i> [76]         | B    |                                | √ |
| Lee, <i>et al.</i> [77]          | B    |                                | √ |
| Chen, <i>et al.</i> [78]         | B    |                                | √ |
| Diaz-Perete, <i>et al.</i> [79]  | B    |                                | √ |
| Tahmasebinia, <i>et al.</i> [80] | B    |                                | √ |
| Aghimien, <i>et al.</i> [81]     | B    |                                | √ |
| Bademosi and Issa [13]           | B    |                                | √ |
| Danel, <i>et al.</i> [82]        | B    |                                | √ |
| Tezel, <i>et al.</i> [83]        | B    |                                | √ |
| Lee and Yu [84]                  | C    | √                              | √ |
| Liao and Teo [85]                | C    | √                              | √ |
| de Soto, <i>et al.</i> [86]      | C    | √                              | √ |
| Yang, <i>et al.</i> [87]         | C    | √                              | √ |
| Hasan, <i>et al.</i> [88]        | C    | √                              | √ |
| Phang, <i>et al.</i> [89]        | C    | √                              | √ |
| Qin, <i>et al.</i> [90]          | C    | √                              | √ |
| Saka and Chan [91]               | C    | √                              | √ |
| You and Feng [17]                | C    | √                              | √ |
| Aghimien, <i>et al.</i> [92]     | C    | √                              | √ |

**Table S7.** Differences between the results from social network analysis and simplified analysis.

| Code | Factor                                                              | Differences in normalized scores (X-Y) |                     |
|------|---------------------------------------------------------------------|----------------------------------------|---------------------|
|      |                                                                     | SNA                                    | Simplified analysis |
| F39  | Perceived overall organizational performance improvement            | 0.346                                  | 0.325               |
| F22  | Corporate strategy and management policy                            | 0.339                                  | 0.275               |
| F19  | Availability of resources                                           | 0.325                                  | 0.400               |
| F26  | Integration and interoperability                                    | 0.298                                  | 0.325               |
| F52  | Immaturity of the technologies                                      | 0.298                                  | 0.050               |
| F53  | Data-related issues                                                 | 0.275                                  | 0.375               |
| F43  | Synchronization of procurement and improved supply chain management | 0.266                                  | 0.225               |
| F35  | Energy efficiency                                                   | 0.255                                  | 0.125               |
| F54  | Uncertainty about the cost efficiency                               | 0.253                                  | 0.300               |
| F27  | Quality, safety, health, and risk management                        | 0.216                                  | 0.400               |
| F44  | Reduced labor                                                       | 0.177                                  | 0.050               |
| F28  | Cost-saving                                                         | 0.174                                  | -0.100              |
| F29  | Time-saving                                                         | 0.169                                  | 0.050               |
| F12  | Lack of legal framework and contract uncertainties                  | 0.152                                  | 0.150               |
| F1   | Level of awareness, acceptance, and applications in the industry    | 0.150                                  | 0.225               |
| F11  | Project size, complexity, site nature, scope, delivery method       | 0.144                                  | 0.200               |
| F15  | Level of stakeholder collaboration and coordination                 | 0.141                                  | 0.150               |
| F47  | Better project delivery                                             | 0.140                                  | 0.100               |
| F46  | Improved estimation method                                          | 0.125                                  | 0.100               |

| Code | Factor                                                                  | Differences in normalized scores<br>(X-Y) |                        |
|------|-------------------------------------------------------------------------|-------------------------------------------|------------------------|
|      |                                                                         | SNA                                       | Simplified<br>analysis |
| F55  | Security of intellectual property and rights                            | 0.123                                     | 0.150                  |
| F56  | Uncertainty about the time efficiency                                   | 0.112                                     | 0.125                  |
| F49  | Reduced claims or litigation (risks)                                    | 0.104                                     | 0.075                  |
| F50  | Optimum performance of manufacturing                                    | 0.096                                     | 0.075                  |
| F41  | Improved information retrieval process                                  | 0.090                                     | 0.000                  |
| F32  | Design flexibility                                                      | 0.087                                     | 0.100                  |
| F25  | Consulting                                                              | 0.080                                     | 0.075                  |
| F37  | Improved facility management and service                                | 0.057                                     | 0.100                  |
| F18  | Availability of capabilities                                            | 0.052                                     | 0.200                  |
| F6   | Shared knowledge and training schemes in the industry                   | 0.045                                     | 0.075                  |
| F51  | Supporting education and training                                       | 0.041                                     | 0.025                  |
| F60  | Difficulty in explaining the output of the new technology to the client | 0.018                                     | 0.025                  |
| F4   | Fragmentation of the construction industry                              | 0.007                                     | -0.175                 |
| F7   | Governmental initiatives or incentives                                  | -0.001                                    | 0.100                  |
| F16  | Lack of commitment from clients                                         | -0.005                                    | 0.050                  |
| F13  | Effective communication among project stakeholders                      | -0.015                                    | -0.100                 |
| F45  | Shared value or value chain                                             | -0.025                                    | 0.025                  |
| F38  | Mass customization                                                      | -0.028                                    | -0.175                 |
| F24  | Unclear benefits, gains, and business value                             | -0.034                                    | -0.075                 |
| F42  | Increased competitive advantage                                         | -0.038                                    | 0.100                  |
| F31  | Simulation and visualization for better decision-making                 | -0.042                                    | -0.100                 |
| F59  | Lack of better-performing devices                                       | -0.042                                    | -0.050                 |
| F9   | Advanced technology development in the industry                         | -0.049                                    | 0.000                  |
| F5   | Appropriate legislation                                                 | -0.054                                    | 0.000                  |
| F2   | Level of standardization                                                | -0.060                                    | 0.100                  |
| F30  | Improved project efficiency and productivity                            | -0.063                                    | 0.175                  |
| F33  | Resource and waste optimization                                         | -0.068                                    | -0.200                 |
| F10  | Pressure to innovate                                                    | -0.088                                    | -0.025                 |
| F57  | Lack of practical validation                                            | -0.094                                    | -0.050                 |
| F58  | Energy consumption                                                      | -0.094                                    | -0.050                 |
| F21  | Organizational culture                                                  | -0.128                                    | -0.100                 |
| F17  | Health and safety risks in the workplace                                | -0.137                                    | -0.075                 |
| F3   | Market demand                                                           | -0.137                                    | -0.075                 |
| F23  | Organizational business modal adaptation                                | -0.170                                    | -0.075                 |
| F40  | Project planning optimization                                           | -0.181                                    | -0.200                 |
| F34  | Improved automation and information-sharing level                       | -0.191                                    | -0.175                 |
| F48  | Easy to use                                                             | -0.192                                    | -0.125                 |
| F20  | Awareness and willingness within organizations                          | -0.193                                    | -0.025                 |
| F14  | Clear contractual provisions                                            | -0.215                                    | -0.150                 |
| F36  | Increased accuracy and reduced errors                                   | -0.275                                    | -0.250                 |
| F8   | Persuasion and inspiration                                              | -0.352                                    | -0.225                 |

| Factors/<br>Articles | Article $j$ | Article $j+1$ | $\vdots$ | $\vdots$ | Article $J$ |
|----------------------|-------------|---------------|----------|----------|-------------|
| $F_i$                | 1           | 1             | 0        | 0        | 1           |
| $F_{i+1}$            | 0           | 1             | 0        | 1        | 1           |
| $F_{i+2}$            | 1           | 1             | 1        | 0        | 0           |
| ...                  | 0           | 1             | 1        | 1        | 0           |
| $F_n$                | 1           | 1             | 0        | 1        | 0           |

**Figure S1.** Example of a reference matrix.

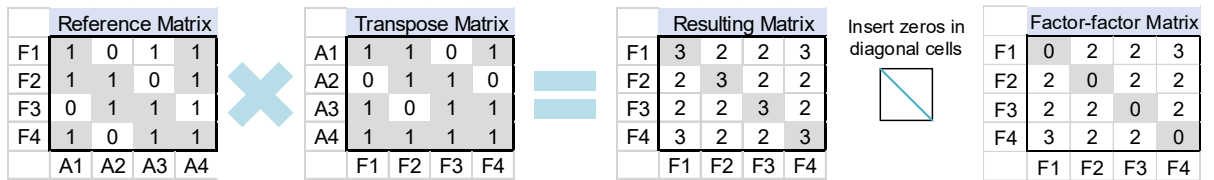

**Figure S2.** Example of the development of a factor-factor matrix.

**Notes:** Letter  $F$  denotes factors and letter  $A$  denotes articles

## Reference

1. Wang, M.; Wang, C.C.; Sepasgozar, S.; Zlatanova, S. A systematic review of digital technology adoption in off-site construction: current status and future direction towards industry 4.0. *Buildings* **2020**, *10*, doi:10.3390/buildings10110204.
2. Sepasgozar, S.M. Differentiating digital twin from digital shadow: Elucidating a paradigm shift to expedite a smart, sustainable built environment. *Buildings* **2021**, *11*, 151, doi:10.3390/buildings11040151.
3. Natephra, W.; Motamedi, A.; Yabuki, N.; Fukuda, T. Integrating 4D thermal information with BIM for building envelope thermal performance analysis and thermal comfort evaluation in naturally ventilated environments. *Building and Environment* **2017**, *124*, 194-208.
4. Adepoju, O.O.; Aigbavboa, C.O. Implementation of Construction 4.0 in Nigeria: Evaluating the Opportunities and Threats on the Workforce. *Acad. J. Interdiscip. Stud.* **2020**, *9*, 254-264, doi:10.36941/ajis-2020-0102.
5. Forcael, E.; Ferrari, I.; Opazo-Vega, A.; Pulido-Arcas, J.A. Construction 4.0: A Literature Review. *Sustainability* **2020**, *12*, doi:10.3390/su12229755.
6. National Building Information Model Standard Project Committee of the United States. *National BIM Standard - United States V3*; 2021.
7. Allen, C.; Shakantu, W. The BIM revolution: a literature review on rethinking the business of construction. In *Sustainable City Xi*, GalianoGarrigos, A., Brebbia, C.A., Eds.; WIT Transactions on Ecology and the Environment; Wit Press: Southampton, 2016; Volume 204, pp. 919-930.
8. American Society for Testing and Materials. *ASTM Standard Terminology for Additive Manufacturing Technologies*; 2015.
9. Craveiro, F.; Duarte, J.P.; Bartolo, H.; Bartolo, P.J. Additive manufacturing as an enabling technology for digital construction: A perspective on Construction 4.0. *Automation in Construction* **2019**, *103*, 251-267, doi:10.1016/j.autcon.2019.03.011.
10. Darko, A.; Chan, A.P.C.; Adabre, M.A.; Edwards, D.J.; Hosseini, M.R.; Ameyaw, E.E. Artificial intelligence in the AEC industry: Scientometric analysis and visualization of research activities. *Autom Constr* **2020**, *112*, doi:10.1016/j.autcon.2020.103081.
11. Liu, C.; Sepasgozar, S.M.; Shirowzhan, S.; Mohammadi, G. Applications of object detection in modular construction based on a comparative evaluation of deep learning algorithms. *Construction Innovation* **2021**, doi:10.1108/CI-02-2020-0017.
12. Davila Delgado, J.M.; Oyedele, L.; Beach, T.; Demian, P. Augmented and Virtual Reality in Construction: Drivers and Limitations for Industry Adoption. *Journal of Construction Engineering and Management* **2020**, *146*, doi:10.1061/(asce)co.1943-7862.0001844.
13. Bademosi, F.; Issa, R.R.A. Factors Influencing Adoption and Integration of Construction Robotics and Automation Technology in the US. *Journal of Construction Engineering and Management* **2021**, *147*, doi:10.1061/(asce)co.1943-7862.0002103.
14. Babiceanu, R.F.; Seker, R. Big Data and virtualization for manufacturing cyber-physical systems: A survey of the current status and future outlook. *Computers in Industry* **2016**, *81*, 128-137, doi:10.1016/j.compind.2016.02.004.
15. Li, J.; Greenwood, D.; Kassem, M. Blockchain in the built environment and construction industry:

- A systematic review, conceptual models and practical use cases. *Automation in Construction* **2019**, *102*, 288-307, doi:10.1016/j.autcon.2019.02.005.
16. Alaloul, W.S.; Liew, M.S.; Zawawi, N.A.W.A.; Kennedy, I.B. Industrial Revolution 4.0 in the construction industry: Challenges and opportunities for stakeholders. *Ain Shams Engineering Journal* **2020**, *11*, 225-230, doi:10.1016/j.asej.2019.08.010.
  17. You, Z.; Feng, L. Integration of Industry 4.0 Related Technologies in Construction Industry: A Framework of Cyber-Physical System. *IEEE Access* **2020**, *8*, 122908-122922, doi:10.1109/ACCESS.2020.3007206.
  18. Zabidin, N.S.; Belayutham, S.; Ibrahim, C.K.I.C. A bibliometric and scientometric mapping of industry 4.0 in construction. *Journal of Information Technology in Construction* **2020**, *25*, doi:10.36680/j.iteon.2020.017.
  19. Li, H.; Chan, G.; Wong, J.K.W.; Skitmore, M. Real-time locating systems applications in construction. *Automation in Construction* **2016**, *63*, 37-47, doi:10.1016/j.autcon.2015.12.001.
  20. Tomlinson, R.F. A Geographic Information System for Regional Planning. *Data Handling and Interpretation* **1968**.
  21. Wang, T.-K.; Zhang, Q.; Chong, H.-Y.; Wang, X. Integrated supplier selection framework in a resilient construction supply chain: An approach via analytic hierarchy process (AHP) and grey relational analysis (GRA). *Sustainability* **2017**, *9*, 289, doi:10.3390/su9020289.
  22. Perrier, N.; Bled, A.; Bourgault, M.; Cousin, N.; Danjou, C.; Pellerin, R.; Roland, T. Construction 4.0: A survey of research trends. *Journal of Information Technology in Construction* **2020**, *25*, 416-437, doi:10.36680/j.itcon.2020.024.
  23. United States Geological Survey. What is remote sensing and what is it used for? Available online: [https://www.usgs.gov/faqs/what-remote-sensing-and-what-it-used?qt-news\\_science\\_products=0#qt-news\\_science\\_products](https://www.usgs.gov/faqs/what-remote-sensing-and-what-it-used?qt-news_science_products=0#qt-news_science_products) (accessed on 3 Sept 2022).
  24. Moselhi, O.; Bardareh, H.; Zhu, Z. Automated data acquisition in construction with remote sensing technologies. *Applied Sciences* **2020**, *10*, 2846.
  25. Du, Z.; Ge, L.; Ng, A.H.-M.; Zhang, Q. Towards a revised framework of modified time series InSAR for mapping land deformation. *Journal of Geodesy* **2020**, *94*, 1-13.
  26. Ghosh, A.; Edwards, D.J.; Hosseini, M.R. Patterns and trends in Internet of Things (IoT) research: future applications in the construction industry. *Engineering Construction and Architectural Management* **2021**, *28*, 457-481, doi:10.1108/ecam-04-2020-0271.
  27. Bock, T. The future of construction automation: Technological disruption and the upcoming ubiquity of robotics. *Automation in Construction* **2015**, *59*, 113-121, doi:10.1016/j.autcon.2015.07.022.
  28. Merschbrock, C.; Munkvold, B.E. Effective digital collaboration in the construction industry - A case study of BIM deployment in a hospital construction project. *Computers in Industry* **2015**, *73*, 1-7, doi:10.1016/j.compind.2015.07.003.
  29. Bilal, M.; Oyedele, L.O.; Qadir, J.; Munir, K.; Ajayi, S.O.; Akinade, O.O.; Owolabi, H.A.; Alaka, H.A.; Pasha, M. Big Data in the construction industry: A review of present status, opportunities, and future trends. *Advanced Engineering Informatics* **2016**, *30*, 500-521, doi:10.1016/j.aei.2016.07.001.
  30. Oesterreich, T.D.; Teuteberg, F. Understanding the implications of digitisation and automation in

- the context of Industry 4.0: A triangulation approach and elements of a research agenda for the construction industry. *Computers in Industry* **2016**, 83, 121-139, doi:10.1016/j.compind.2016.09.006.
31. Wu, P.; Wang, J.; Wang, X. A critical review of the use of 3-D printing in the construction industry. *Automation in Construction* **2016**, 68, 21-31, doi:10.1016/j.autcon.2016.04.005.
  32. Ozorhon, B.; Karahan, U. Critical Success Factors of Building Information Modeling Implementation. *Journal of Management in Engineering* **2017**, 33, 10, doi:Artn 04016054 10.1061/(Asce)Me.1943-5479.0000505.
  33. Amuda-Yusuf, G. Critical Success Factors for Building Information Modelling Implementation. *Construction Economics and Building* **2018**, 18, 55-73, doi:10.5130/AJCEB.v18i3.6000.
  34. Antwi-Afari, M.F.; Li, H.; Parn, E.A.; Edwards, D.J. Critical success factors for implementing building information modelling (BIM): A longitudinal review. *Autom Constr* **2018**, 91, 100-110, doi:10.1016/j.autcon.2018.03.010.
  35. Chen, Q.; de Soto, B.G.; Adey, B.T. Construction automation: Research areas, industry concerns and suggestions for advancement. *Automation in Construction* **2018**, 94, 22-38, doi:10.1016/j.autcon.2018.05.028.
  36. Dallasega, P.; Rauch, E.; Linder, C. Industry 4.0 as an enabler of proximity for construction supply chains: A systematic literature review. *Computers in Industry* **2018**, 99, 205-225, doi:10.1016/j.compind.2018.03.039.
  37. Jin, R.; Gao, S.; Cheshmehzangi, A.; Aboagye-Nimo, E. A holistic review of off-site construction literature published between 2008 and 2018. *Journal of Cleaner Production* **2018**, 202, 1202-1219, doi:10.1016/j.jclepro.2018.08.195.
  38. Chan, D.W.M.; Olawumi, T.O.; Ho, A.M.L. Critical success factors for building information modelling (BIM) implementation in Hong Kong. *Engineering Construction and Architectural Management* **2019**, 26, 1838-1854, doi:10.1108/Ecam-05-2018-0204.
  39. Chowdhury, T.; Adafin, J.; Wilkinson, S. Review of digital technologies to improve productivity of New Zealand construction industry. *Journal of Information Technology in Construction* **2019**, 24, 569-587, doi:10.36680/j.itcon.2019.032.
  40. García de Soto, B.; Agustí-Juan, I.; Joss, S.; Hunhevicz, J. Implications of Construction 4.0 to the workforce and organizational structures. *International Journal of Construction Management* **2019**, doi:10.1080/15623599.2019.1616414.
  41. Ibrahim, F.S.B.; Esa, M.B.; Kamal, E.B.M. Towards construction 4.0: Empowering bim skilled talents in malaysia. *Int. J. Sci. Technol. Res.* **2019**, 8, 1694-1700.
  42. Koseoglu, O.; Keskin, B.; Ozorhon, B. Challenges and Enablers in BIM-Enabled Digital Transformation in Mega Projects: The Istanbul New Airport Project Case Study. *Buildings* **2019**, 9, doi:10.3390/buildings9050115.
  43. Maskuriy, R.; Selamat, A.; Ali, K.N.; Maresova, P.; Krejcar, O. Industry 4.0 for the Construction Industry-How Ready Is the Industry? *Applied Sciences-Basel* **2019**, 9, doi:10.3390/app9142819.
  44. Maskuriy, R.; Selamat, A.; Maresova, P.; Krejcar, O.; David, O.O. Industry 4.0 for the Construction Industry: Review of Management Perspective. *Economies* **2019**, 7, doi:10.3390/economies7030068.
  45. Olawumi, T.O.; Chan, D.W.M. Critical success factors for implementing building information

- modeling and sustainability practices in construction projects: A Delphi survey. *Sustainable Dev.* **2019**, 27, 587-602, doi:10.1002/sd.1925.
46. Tetik, M.; Peltokorpi, A.; Seppanen, O.; Holmstrom, J. Direct digital construction: Technology-based operations management practice for continuous improvement of construction industry performance. *Automation in Construction* **2019**, 107, doi:10.1016/j.autcon.2019.102910.
  47. Abdul Nabi, M.; El-adaway, I.H. Modular Construction: Determining Decision-Making Factors and Future Research Needs. *Journal of Management in Engineering* **2020**, 36, doi:10.1061/(asce)me.1943-5479.0000859.
  48. Dao, T.-N.; Chen, P.-H.; Nguyen, T.-Q. Critical Success Factors and a Contractual Framework for Construction Projects Adopting Building Information Modeling in Vietnam. *Int. J. Civ. Eng.* **2020**, 19, 85-102, doi:10.1007/s40999-020-00542-3.
  49. Evans, M.; Farrell, P. Barriers to integrating building information modelling (BIM) and lean construction practices on construction mega-projects: a Delphi study. *Benchmarking: An International Journal* **2020**, 28, 652-669, doi:10.1108/bij-04-2020-0169.
  50. Evans, M.; Farrell, P.; Mashali, A.; Zewein, W. Critical success factors for adopting building information modelling (BIM) and lean construction practices on construction mega-projects: a Delphi survey. *J. Eng. Des. Technol.* **2020**, 19, 537-556, doi:10.1108/jedt-04-2020-0146.
  51. Khoshfetrat, R.; Sarvari, H.; Chan, D.W.M.; Rakhshanifar, M. Critical risk factors for implementing building information modelling (BIM): a Delphi-based survey. *Int. J. Constr. Manage.* **2020**, 10, doi:10.1080/15623599.2020.1788759.
  52. Lekan, A.; Aigbavboa, C.; Babatunde, O.; Olabosipo, F.; Christiana, A. Disruptive technological innovations in construction field and fourth industrial revolution intervention in the achievement of the sustainable development goal 9. *International Journal of Construction Management* **2020**, doi:10.1080/15623599.2020.1819522.
  53. Lekan, A.; Clinton, A.; Fayomi, O.S.I.; James, O. Lean thinking and industrial 4.0 approach to achieving construction 4.0 for industrialization and technological development. *Buildings* **2020**, 10, doi:10.3390/buildings10120221.
  54. Maali, O.; Lines, B.; Smithwick, J.; Hurtado, K.; Sullivan, K. Change management practices for adopting new technologies in the design and construction industry. *Journal of Information Technology in Construction* **2020**, 25, 325-341, doi:10.36680/j.itcon.2020.019.
  55. Newman, C.; Edwards, D.; Martek, I.; Lai, J.; Thwala, W.D.; Rillie, I. Industry 4.0 deployment in the construction industry: a bibliometric literature review and UK-based case study. *Smart and Sustainable Built Environment* **2020**, doi:10.1108/sasbe-02-2020-0016.
  56. Okakpu, A.; Ghaffarianhoseini, A.; Tookey, J.; Haar, J.; Ghaffarianhoseini, A.; Rehman, A.U. Risk factors that influence adoption of Building Information Modelling (BIM) for refurbishment of complex building projects: stakeholders perceptions. *Int. J. Constr. Manage.* **2020**, 13, doi:10.1080/15623599.2020.1795985.
  57. Olanrewaju, O.I.; Chileshe, N.; Babarinde, S.A.; Sandanayake, M. Investigating the barriers to building information modeling (BIM) implementation within the Nigerian construction industry. *Engineering Construction and Architectural Management* **2020**, 27, 2931-2958, doi:10.1108/Ecam-01-2020-0042.
  58. Osunsanmi, T.O.; Aigbavboa, C.O.; Oke, A.E.; Liphadzi, M. Appraisal of stakeholders' willingness

- to adopt construction 4.0 technologies for construction projects. *Built Environment Project and Asset Management* **2020**, *10*, 547-565, doi:10.1108/bepam-12-2018-0159.
59. Patrucco, A.; Ciccullo, F.; Pero, M. Industry 4.0 and supply chain process re-engineering A coproduction study of materials management in construction. *Business Process Management Journal* **2020**, *26*, 1093-1119, doi:10.1108/bpmj-04-2019-0147.
  60. Perrier, N.; Bled, A.; Bourgault, M.; Cousin, N.; Danjou, C.; Pellerin, R.; Roland, T. Construction 4.0: A survey of research trends. *J. Inf. Technol. Constr.* **2020**, *25*, 416-437, doi:10.36680/j.itcon.2020.024.
  61. Qi, B.; Razkenari, M.; Li, J.X.; Costin, A.; Kibert, C.; Qian, S.Y. Investigating U.S. Industry Practitioners' Perspectives towards the Adoption of Emerging Technologies in Industrialized Construction. *Buildings* **2020**, *10*, 21, doi:10.3390/buildings10050085.
  62. Wen, J.; Gheisari, M. Using virtual reality to facilitate communication in the AEC domain: a systematic review. *Construction Innovation-England* **2020**, *20*, 509-542, doi:10.1108/ci-11-2019-0122.
  63. Abdul Nabi, M.; El-adaway, I.H. Understanding the Key Risks Affecting Cost and Schedule Performance of Modular Construction Projects. *Journal of Management in Engineering* **2021**, *37*, doi:10.1061/(asce)me.1943-5479.0000917.
  64. Alade, K.; Windapo, A.; Wachira-Towey, I.N. Rethinking leadership in the fourth industrial revolution: lessons for construction business organizations. *Journal of Leadership Studies* **2021**, *15*, 74-80, doi:10.1002/jls.21731.
  65. Botton, C.; Rivest, L.; Ghnaya, O.; Chouchen, M. What is at the Root of Construction 4.0: A Systematic Review of the Recent Research Effort. *Archives of Computational Methods in Engineering* **2021**, *28*, 2331-2350, doi:10.1007/s11831-020-09457-7.
  66. Demirkesen, S.; Tezel, A. Investigating major challenges for industry 4.0 adoption among construction companies. *Engineering Construction and Architectural Management* **2021**, doi:10.1108/ecam-12-2020-1059.
  67. Karmakar, A.; Delhi, V.S.K. Construction 4.0: what we know and where we headed? *Journal of Information Technology in Construction* **2021**, *26*, 526-545, doi:10.36680/j.itcon.2021.028.
  68. Kedir, F.; Hall, D.M. Resource efficiency in industrialized housing construction - A systematic review of current performance and future opportunities. *Journal of Cleaner Production* **2021**, *286*, doi:10.1016/j.jclepro.2020.125443.
  69. Kozlovskaya, M.; Klosova, D.; Strukova, Z. Impact of Industry 4.0 Platform on the Formation of Construction 4.0 Concept: A Literature Review. *Sustainability* **2021**, *13*, doi:10.3390/su13052683.
  70. Lekan, A.; Clinton, A.; James, O. The disruptive adaptations of construction 4.0 and industry 4.0 as a pathway to a sustainable innovation and inclusive industrial technological development. *Buildings* **2021**, *11*, 1-28, doi:10.3390/buildings11030079.
  71. Li, C.Z.; Hu, M.; Xiao, B.; Chen, Z.; Tam, V.W.Y.; Zhao, Y. Mapping the Knowledge Domains of Emerging Advanced Technologies in the Management of Prefabricated Construction. *Sustainability* **2021**, *13*, doi:10.3390/su13168800.
  72. Mannino, A.; Dejacco, M.C.; Cecconi, F.R. Building Information Modelling and Internet of Things Integration for Facility Management-Literature Review and Future Needs. *Applied Sciences-Basel* **2021**, *11*, doi:10.3390/app11073062.

73. Mansour, H.; Aminudin, E.; Omar, B.; Zakaria, R.; Lau, S.E.N.; Al-Sarayreh, A. Industry 4.0 and construction performance: From literature review to conceptual framework. *Malays. Constr. Res. J.* **2021**, *Specialissue13*, 53-67.
74. Turner, C.J.; Oyekan, J.; Stergioulas, L.; Griffin, D. Utilizing Industry 4.0 on the Construction Site: Challenges and Opportunities. *IEEE Trans. Ind. Inf.* **2021**, *17*, 746-756, doi:10.1109/TII.2020.3002197.
75. Gosselin, C.; Duballet, R.; Roux, P.; Gaudilliere, N.; Dirrenberger, J.; Morel, P. Large-scale 3D printing of ultra-high performance concrete - a new processing route for architects and builders. *Materials & Design* **2016**, *100*, 102-109, doi:10.1016/j.matdes.2016.03.097.
76. Boke, J.; Knaack, U.; Hemmerling, M. State-of-the-art of intelligent building envelopes in the context of intelligent technical systems. *Intell. Buold. Int.* **2019**, *11*, 27-45, doi:10.1080/17508975.2018.1447437.
77. Lee, P.C.; Wei, J.H.; Ting, H.I.; Lo, T.P.; Long, D.B.; Chang, L.M. Dynamic Analysis of Construction Safety Risk and Visual Tracking of Key Factors based on Behavior-based Safety and Building Information Modeling. *KSCE J. Civ. Eng.* **2019**, *23*, 4155-4167, doi:10.1007/s12205-019-0283-z.
78. Chen, Q.; Adey, B.T.; Haas, C.; Hall, D.M. Using look-ahead plans to improve material flow processes on construction projects when using BIM and RFID technologies. *Construction Innovation-England* **2020**, *20*, 471-508, doi:10.1108/ci-11-2019-0133.
79. Diaz-Perete, D.; Mercado-Colmenero, J.M.; Valderrama-Zafra, J.M.; Martin-Doñate, C. New procedure for BIM characterization of architectural models manufactured using fused deposition modeling and plastic materials in 4.0 advanced construction environments. *Polym.* **2020**, *12*, 1-29, doi:10.3390/polym12071498.
80. Tahmasebinia, F.; Sepasgozar, S.M.E.; Shirowzhan, S.; Niemela, M.; Tripp, A.; Nagabhyrava, S.; Ko, K.; Mansuri, Z.; Alonso-Marroquin, F. Criteria development for sustainable construction manufacturing in Construction Industry 4.0 Theoretical and laboratory investigations. *Construction Innovation-England* **2020**, *20*, 379-400, doi:10.1108/ci-10-2019-0103.
81. Aghimien, D.; Aigbavboa, C.; Matabane, K. Dynamic capabilities for construction organizations in the fourth industrial revolution era. *International Journal of Construction Management* **2021**, doi:10.1080/15623599.2021.1940745.
82. Danel, T.; Lafhaj, Z.; Puppala, A.; Lienard, S.; Richard, P. Proposal for tower crane productivity indicators based on data analysis in the era of construction 4.0. *Buildings* **2021**, *11*, 1-15, doi:10.3390/buildings11010021.
83. Tezel, A.; Febrero, P.; Papadonikolaki, E.; Yitmen, I. Insights into Blockchain Implementation in Construction: Models for Supply Chain Management. *J. Manage. Eng.* **2021**, *37*, doi:10.1061/(asce)me.1943-5479.0000939.
84. Lee, S.; Yu, J.H. Comparative study of BIM acceptance between Korea and the United States. *Journal of Construction Engineering and Management* **2016**, *142*, 9, doi:10.1061/(asce)co.1943-7862.0001076.
85. Liao, L.H.; Teo, E.A.L. Critical Success Factors for Enhancing the Building Information Modelling Implementation in Building Projects in Singapore. *J. Civ. Eng. Manag.* **2017**, *23*, 1029-1044, doi:10.3846/13923730.2017.1374300.

86. de Soto, B.G.; Agusti-Juan, I.; Hunhevicz, J.; Joss, S.; Graser, K.; Habert, G.; Adey, B.T. Productivity of digital fabrication in construction: Cost and time analysis of a robotically built wall. *Automation in Construction* **2018**, *92*, 297-311, doi:10.1016/j.autcon.2018.04.004.
87. Yang, Z.H.; Wang, Y.W.; Sun, C.S. Emerging information technology acceptance model for the development of smart construction system *J. Civ. Eng. Manag.* **2018**, *24*, 457-468, doi:10.3846/jcem.2018.5186.
88. Hasan, A.; Ahn, S.; Rameezdeen, R.; Baroudi, B. Empirical Study on Implications of Mobile ICT Use for Construction Project Management. *J. Manage. Eng.* **2019**, *35*, doi:10.1061/(asce)me.1943-5479.0000721.
89. Phang, T.C.H.; Chen, C.; Tiong, R.L.K. New Model for Identifying Critical Success Factors Influencing BIM Adoption from Precast Concrete Manufacturers' View. *Journal of Construction Engineering and Management* **2020**, *146*, doi:Artn 0402001410.1061/(Asce)Co.1943-7862.0001773.
90. Qin, X.; Shi, Y.; Lyu, K.C.; Mo, Y.Y. Using a Tam-Toe Model to Explore Factors of Building Information Modelling (BIM) Adoption in the Construction Industry. *J. Civ. Eng. Manag.* **2020**, *26*, 259-277, doi:10.3846/jcem.2020.12176.
91. Saka, A.B.; Chan, D.W.M. Profound barriers to building information modelling (BIM) adoption in construction small and medium-sized enterprises (SMEs) An interpretive structural modelling approach. *Construction Innovation-England* **2020**, *20*, 261-284, doi:10.1108/Ci-09-2019-0087.
92. Aghimien, D.; Aigbavboa, C.; Meno, T.; Ikuabe, M. Unravelling the risks of construction digitalisation in developing countries. *Constr. Innov.* **2021**, *21*, 456-475, doi:10.1108/ci-02-2020-0026.
